# Supplementary material
Source: publisher figshare collection journal article supplement (https://brill.figshare.com/articles/dataset/_/24421615)
Supplement: Supplementary file 1 [file 1]

# **Ability of black soldier fly larvae to bioaccumulate tocopherols from different substrates and measurement of larval tocopherol bioavailability *in vitro***

*L. Morand-Laffargue<sup>1</sup>, D. Vairo<sup>1</sup>, C. Halimi<sup>1</sup>, E. Chiarello<sup>2</sup>, B. Creton<sup>3</sup>, D. Sabatier<sup>3</sup> and P. Borel<sup>1\*</sup>*

<sup>1</sup>UMR C2VN “Center for CardioVascular and Nutrition Research of Marseille”, Faculté de Médecine, INRAE, Aix-Marseille Univ, INSERM, 27, boulevard Jean Moulin, 13005 Marseille, France; <sup>2</sup>Department of Agri-Food Sciences and Technologies (DISTAL), University of Bologna, 47521 Cesena, Italy; <sup>3</sup>BioMiMetiC, 13150 Boulbon, France; \*[patrick.borel@univ-amu.fr](mailto:patrick.borel@univ-amu.fr)

**Supplementary material**
